# Supplementary material
Source: Springer Nature journal article supplement (https://www.springermedizin.de/resource/supplementary/12885_2011_2901_MOESM3_ESM.pdf/9462242)

**BRAF**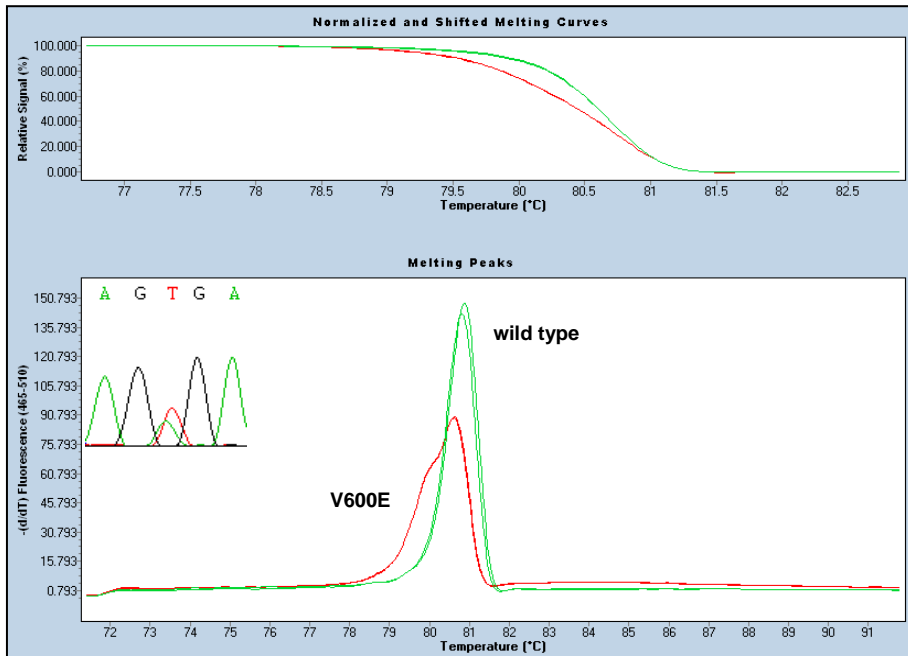**EGFR exon 19**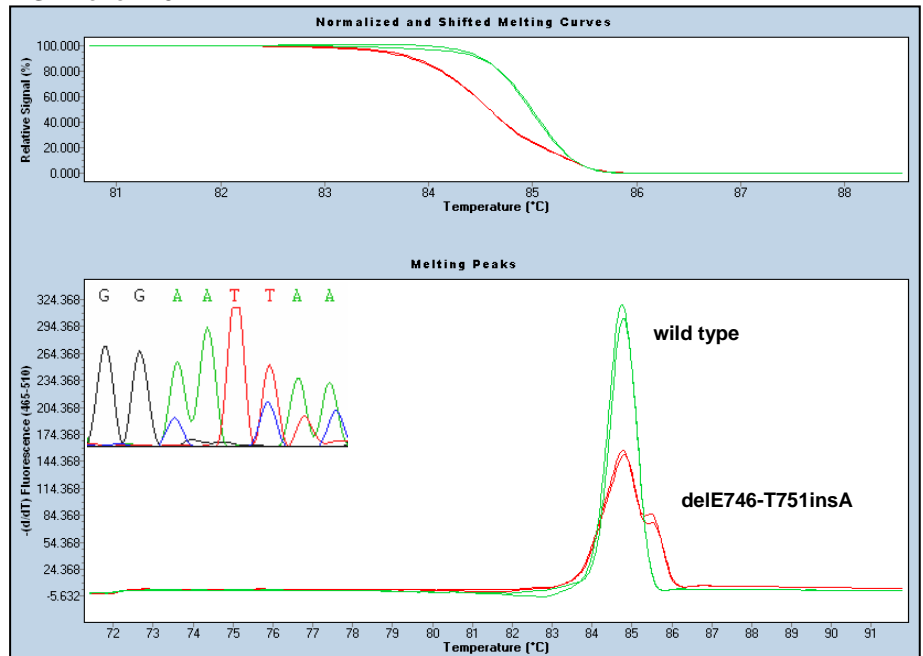**EGFR exon 20**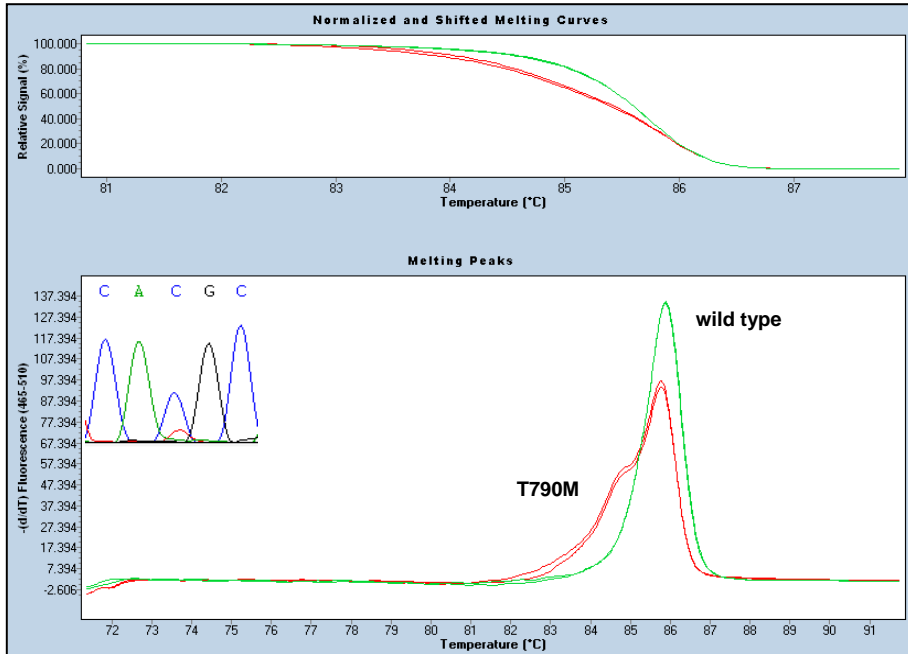**EGFR exon 21**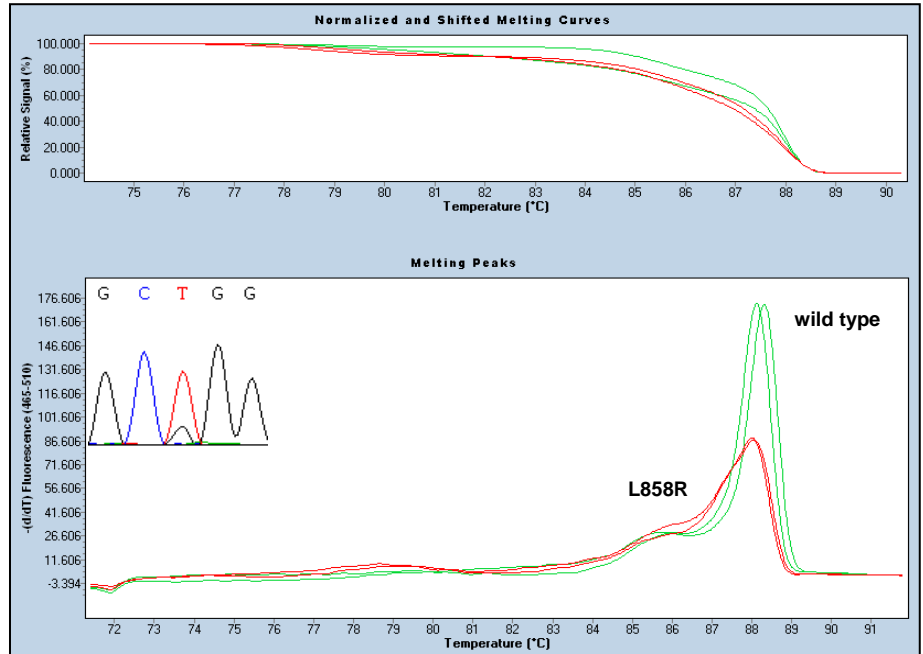

Supplement: MOESM3 [file 9462242]
